# Supplementary material for: Anthropogenic and Natural Causes for the Interannual Variation of PM 2.5 in East Asia During Summer Monsoon Periods From 2008 to 2018
Source: Copernicus journal article supplement (doi:10.5194/egusphere-2025-10), 2025-04-14
Supplement: Supplementary file [file egusphere-2025-10-AC1-supplement.pdf]

## Response to Reviewers

**No.:** ACP-2025-10

**Title:** Anthropogenic and Natural Causes for the Interannual Variation of PM<sub>2.5</sub> in East Asia During Summer Monsoon Periods From 2008 to 2018

### **Anonymous referee #3:**

The manuscript “Anthropogenic and Natural Causes for the Interannual Variation of PM<sub>2.5</sub> in East Asia During Summer Monsoon Periods From 2008 to 2018” by Ma et al. used a regional climate chemistry-ecosystem coupled model to investigate interannual variations in PM<sub>2.5</sub> across East Asia from 2008 to 2018 and investigates the drivers. This has been an important topic in the past years, and this work improves over previous studies by exploring the impact of CO<sub>2</sub>. I feel this point is of interest to the community and falls within the scope of ACP. The manuscript is also well written and easy to follow. I recommend publication after addressing the following points.

**Response:** We thank referee #3 for careful reading and valuable comments. We have responded to each specific comment in blue below. Please note that the line numbers given below refer to the clean version of the manuscript.

1. My major concern is the boundary between CO<sub>2</sub> change and meteorology change in the work. As mentioned in the text, CO<sub>2</sub> could influence PM via changing radiation, temperature, and precipitation. Aren't these already counted in the meteorology change? This needs to be explained clearer.

**Response:** Thanks. As shown in Table 1, the difference between SIM<sub>Base</sub> and SIM<sub>MET=2008</sub> (SIM<sub>Base</sub> - SIM<sub>MET=2008</sub>) quantifies the impact of meteorological variability on PM<sub>2.5</sub> concentrations. Here, “meteorological variability” refers to the year-to-year changes in weather relative to the fixed 2008 baseline. In contrast, the difference between SIM<sub>Base</sub> and SIM<sub>CO2=2008</sub> (SIM<sub>Base</sub> - SIM<sub>CO2=2008</sub>) isolates the effect of CO<sub>2</sub> emission changes on PM<sub>2.5</sub>. As a principal greenhouse gas, CO<sub>2</sub> modifies meteorological parameters—such as radiation, temperature, and precipitation—which in turn influence PM<sub>2.5</sub> levels. In this comparison, all meteorological changes derive solely from variations in CO<sub>2</sub> concentration, a mechanism fundamentally different from the meteorological influences identified in Experiments SIM<sub>Base</sub> and SIM<sub>MET=2008</sub>.

We have added some discussions on this aspect.

**Table 1.** The Numerical experimental in this study.

| Experiment          | Time      | Meteorological fields | CO <sub>2</sub> emissions | Anthropogenic pollutant emissions |
|---------------------|-----------|-----------------------|---------------------------|-----------------------------------|
| SIM <sub>2008</sub> | 2008      | 2008                  | 2008                      | 2008                              |
| SIM <sub>Base</sub> | 2009-2018 | 2009-2018             | 2009-2018                 | 2009-2018                         |

|                         |           |           |           |           |
|-------------------------|-----------|-----------|-----------|-----------|
| SIM <sub>MET=2008</sub> | 2009-2018 | 2008      | 2009-2018 | 2009-2018 |
| SIM <sub>CO2=2008</sub> | 2009-2018 | 2009-2018 | 2008      | 2009-2018 |

Changes in manuscript:

#### 2.1 Model description

(L141–148): “In the RegCM-Chem-YIBs model, changes in CO<sub>2</sub> concentrations affect PM<sub>2.5</sub> primarily via two mechanisms: first, CO<sub>2</sub>-induced radiative forcing alters the atmospheric radiation balance, leading to shifts in temperature, precipitation, and boundary-layer structure that modulate PM<sub>2.5</sub> formation, transport, and removal(Li and Mölders, 2008; Matthews, 2007); And second, through the YIBs module, changes in CO<sub>2</sub> concentration modulate photosynthetic activity and stomatal behavior, altering BVOCs emissions that undergo atmospheric photochemical oxidation to form secondary organic aerosols, a significant fraction of PM<sub>2.5</sub> (Kergoat et al., 2002; Kellomaki and Wang, 1998).”

#### 2.3 Experiment settings

(L189–193): “It is noteworthy that, as a principal greenhouse gas, CO<sub>2</sub> modifies meteorological parameters—such as radiation, temperature, and precipitation—which in turn influence PM<sub>2.5</sub> levels. In this comparison, all meteorological changes derive solely from variations in CO<sub>2</sub> emissions, a mechanism fundamentally different from the meteorological influences identified in experiments SIM<sub>Base</sub> and SIM<sub>MET=2008</sub>.”

### References

- Kellomaki, S. and Wang, K. Y.: Growth, respiration and nitrogen content in needles of Scots pine exposed to elevated ozone and carbon dioxide in the field, *Environmental pollution* (Barking, Essex : 1987), 101, 263-274, 10.1016/s0269-7491(98)00036-0, 1998.
- Kergoat, L., Lafont, S., Douville, H., Berthelot, B., Dedieu, G., Planton, S., and Royer, J. F.: Impact of doubled CO<sub>2</sub> on global-scale leaf area index and evapotranspiration:: Conflicting stomatal conductance and LAI responses -: art. no. 4808, *Journal of Geophysical Research-Atmospheres*, 107, 10.1029/2001jd001245, 2002.
- Li, Z. and Mölders, N.: Interaction of impacts of doubling CO<sub>2</sub> and changing regional land-cover on evaporation, precipitation, and runoff at global and regional scales, *International Journal of Climatology*, 28, 1653-1679, 10.1002/joc.1666, 2008.
- Matthews, H. D.: Implications of CO<sub>2</sub> fertilization for future climate change in a coupled climate-carbon model, *Global Change Biology*, 13, 1068-1078, 10.1111/j.1365-2486.2007.01343.x, 2007.

2. Another important concern is for Section 3.2 and 3.3: I would suggest present some statistics other than just make the conclusions by spatial distribution plots. e.g., when you say a reduction of PM<sub>2.5</sub> is associated with an increase of a certain factor, did you find a correlation? We cannot simply say a decrease of A is due to an increase of B and a decrease of C, they may just not relate to each other with small correlation.

**Response:** Thanks. We have provided the relevant statistical data in the supplementary information and have incorporated Tables S1–S4 into the main manuscript (Tables 3–6) to facilitate easier access for readers.

We attribute changes in PM<sub>2.5</sub> concentrations to three primary factors: meteorological variability, CO<sub>2</sub> emission changes, and anthropogenic pollutant emissions changes. In Section 3.2, we assessed the combined effects of meteorological factors—including temperature, precipitation, wind speed, and planetary boundary layer height—on PM<sub>2.5</sub> concentrations, without isolating the individual contributions of each factor. As illustrated in Figure 4 and Table 4, PM<sub>2.5</sub> concentrations exhibit a negative correlation with precipitation and a positive correlation with temperature, elucidating the mechanisms by which meteorological conditions influence PM<sub>2.5</sub> levels.

Similarly, in Section 3.3, we quantified the integrated impact of CO<sub>2</sub> on atmospheric PM<sub>2.5</sub> concentrations through its modulation of biogenic volatile organic compound (BVOC) emissions and alteration of meteorological conditions.

Your insightful suggestion has provided us with a new perspective. In our forthcoming research, we plan to conduct sensitivity experiments by individually fixing specific meteorological variables. This approach will enable us to independently assess the impact of temperature, precipitation, wind speed, and other factors on PM<sub>2.5</sub> concentrations. Additionally, we aim to distinguish the respective impacts of CO<sub>2</sub>-induced meteorological changes and CO<sub>2</sub>-driven alterations in BVOC emissions on PM<sub>2.5</sub> levels. This line of inquiry represents a deeper exploration of the subject and promises to yield valuable insights.

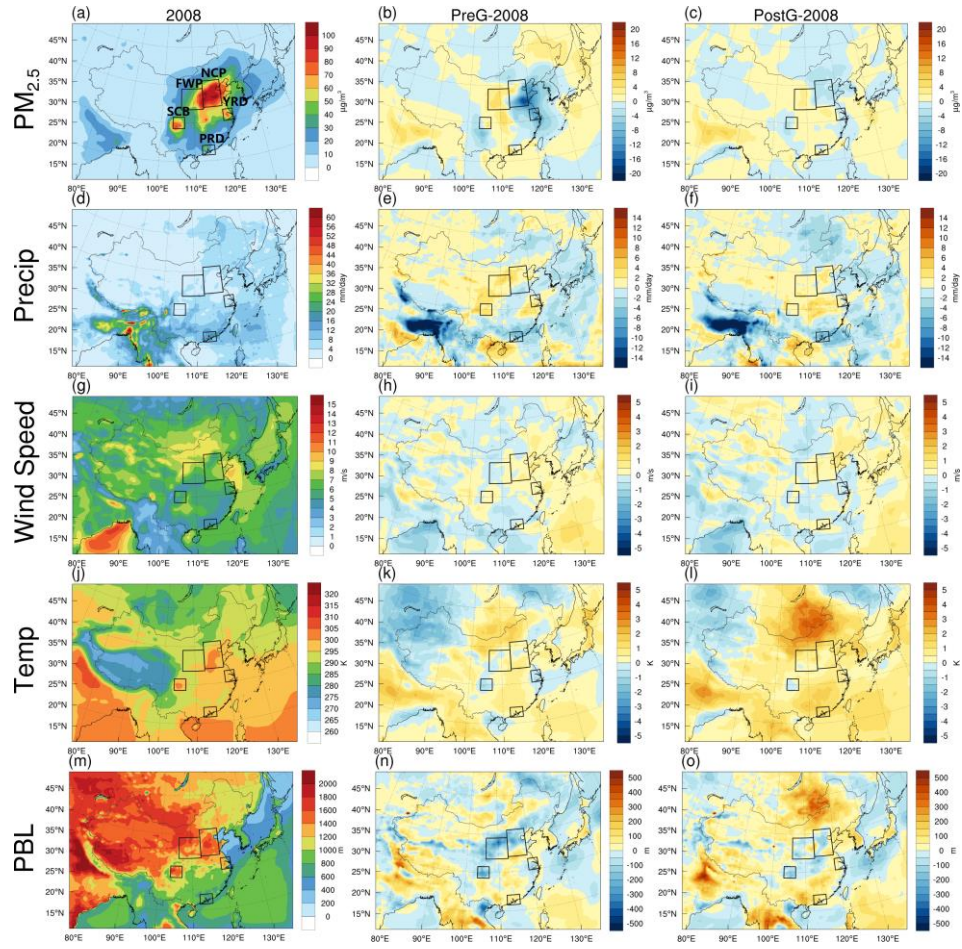

**Figure 4.** The PM<sub>2.5</sub> (a–c,  $\mu\text{g}/\text{m}^3$ ), precipitation (d–f, mm/day), wind speed (g–i, m/s), temperature (j–l, K), and Planetary Boundary Layer (PBL) height (m–o, m) during the EASM period in 2008 (left), and their mean changes due to meteorological variations in PreG (2009–2013, center) and PostG (2014–2018, right) phase relative to 2008 ( $\text{SIM}_{\text{Base}} - \text{SIM}_{\text{MET}=2008}$ ).

**Table 4.** Impact of meteorological condition changes on PM<sub>2.5</sub> ( $\mu\text{g}/\text{m}^3$ ), precipitation (mm/day), wind speed (m/s), near-surface temperature (K), and Planetary Boundary Layer (PBL) height (m) during the EASM period in PreG (2009–2013) and PostG (2014–2018) phase relative to 2008 ( $\text{SIM}_{\text{Base}} - \text{SIM}_{\text{MET}=2008}$ ).

| Region | Period | PM <sub>2.5</sub><br>( $\mu\text{g}/\text{m}^3$ ) | Precipitation<br>(mm/day) | Wind Speed<br>(m/s) | Near-Surface<br>Temperature<br>(K) | PBL<br>(m) |
|--------|--------|---------------------------------------------------|---------------------------|---------------------|------------------------------------|------------|
| NCP    | PreG   | -4.01                                             | 0.58                      | 0.17                | 0.32                               | -46.8      |
|        | PostG  | -1.6                                              | 0.6                       | 0.26                | 0.6                                | -14.5      |
| FWP    | PreG   | 2.32                                              | 1.68                      | -0.06               | 0.1                                | -108.5     |
|        | PostG  | 1                                                 | 0.81                      | 0.05                | 0.46                               | -15.3      |
| YRD    | PreG   | -6.31                                             | 1.02                      | 0.18                | -0.29                              | -33.9      |
|        | PostG  | -0.43                                             | 0.48                      | -0.08               | 0.45                               | 21.9       |
| PRD    | PreG   | 1.49                                              | -2.39                     | -0.02               | 0.36                               | 29.6       |
|        | PostG  | 0.11                                              | -3.24                     | 0.18                | 1.00                               | 52.2       |

|     |       |       |      |       |       |        |
|-----|-------|-------|------|-------|-------|--------|
| SCB | PreG  | 0.29  | 1.81 | 0.13  | -0.58 | -136.5 |
|     | PostG | -1.14 | 0.37 | -0.03 | -0.14 | -76    |

Changes in manuscript:

**Table 3.** Changes in near-surface PM<sub>2.5</sub> concentrations (µg/m<sup>3</sup>) during the EASM period from 2009 to 2018 relative to 2008 in the North China Plain (NCP), Fen-Wei Plain (FWP), Yangtze River Delta (YRD), Pearl River Delta (PRD), and Sichuan Basin (SCB) (SIM<sub>Base</sub> - SIM<sub>2008</sub>).

| Year  | NCP    | FWP    | YRD    | PRD   | SCB    |
|-------|--------|--------|--------|-------|--------|
| 2009  | -11.24 | -1.29  | -11.37 | 1.41  | -3.16  |
| 2010  | -3.87  | 1.9    | -15.2  | -3.57 | -4.79  |
| 2011  | -6.27  | 0.22   | -14.76 | 0.13  | -8.65  |
| 2012  | -7.42  | 1.69   | -17.61 | 2.35  | -15.99 |
| 2013  | -14.67 | -15.49 | -14.9  | -6.34 | -20.37 |
| 2014  | -24.26 | -15.36 | -19.95 | -6.72 | -22.87 |
| 2015  | -31.41 | -16.9  | -27.76 | -9.91 | -31.75 |
| 2016  | -38.5  | -25.23 | -32.43 | -8.18 | -35.58 |
| 2017  | -40.69 | -25.49 | -26.21 | -5.82 | -37.43 |
| 2018  | -48.96 | -27.83 | -33.08 | -9.53 | -42.19 |
| PreG  | -8.69  | -2.59  | -14.77 | -1.20 | -10.59 |
| PostG | -36.76 | -22.16 | -27.89 | -8.03 | -33.96 |

**Table 4.** Impact of meteorological condition changes on PM<sub>2.5</sub> (µg/m<sup>3</sup>), precipitation (mm/day), wind speed (m/s), near-surface temperature (K), and Planetary Boundary Layer (PBL) height (m) during the EASM period in PreG (2009–2013) and PostG (2014–2018) phase relative to 2008 (SIM<sub>Base</sub> - SIM<sub>MET=2008</sub>).

| Region | Period | PM <sub>2.5</sub><br>(µg/m <sup>3</sup> ) | Precipitation<br>(mm/day) | Wind<br>Speed<br>(m/s) | Near-Surface<br>Temperature<br>(K) | PBL<br>(m) |
|--------|--------|-------------------------------------------|---------------------------|------------------------|------------------------------------|------------|
| NCP    | PreG   | -4.01                                     | 0.58                      | 0.17                   | 0.32                               | -46.8      |
|        | PostG  | -1.6                                      | 0.6                       | 0.26                   | 0.6                                | -14.5      |
| FWP    | PreG   | 2.32                                      | 1.68                      | -0.06                  | 0.1                                | -108.5     |
|        | PostG  | 1                                         | 0.81                      | 0.05                   | 0.46                               | -15.3      |
| YRD    | PreG   | -6.31                                     | 1.02                      | 0.18                   | -0.29                              | -33.9      |
|        | PostG  | -0.43                                     | 0.48                      | -0.08                  | 0.45                               | 21.9       |
| PRD    | PreG   | 1.49                                      | -2.39                     | -0.02                  | 0.36                               | 29.6       |
|        | PostG  | 0.11                                      | -3.24                     | 0.18                   | 1.00                               | 52.2       |
| SCB    | PreG   | 0.29                                      | 1.81                      | 0.13                   | -0.58                              | -136.5     |
|        | PostG  | -1.14                                     | 0.37                      | -0.03                  | -0.14                              | -76        |

**Table 5.** Impact of CO<sub>2</sub> emission changes on PM<sub>2.5</sub> (µg/m<sup>3</sup>), CO<sub>2</sub> (ppm), precipitation (mm/day), and isoprene (µg/m<sup>3</sup>) during the EASM period in PreG (2009–2013) and PostG (2014–2018) phase relative to 2008 (SIM<sub>Base</sub> - SIM<sub>CO2=2008</sub>).

| Region | Period | PM <sub>2.5</sub><br>( $\mu\text{g}/\text{m}^3$ ) | CO <sub>2</sub><br>(ppm) | Precipitation<br>(mm/day) | Isoprene<br>( $\mu\text{g}/\text{m}^3$ ) |
|--------|--------|---------------------------------------------------|--------------------------|---------------------------|------------------------------------------|
| NCP    | PreG   | 0.6                                               | 3.19                     | 0.27                      | -0.1                                     |
|        | PostG  | -1.3                                              | 4.24                     | 0.13                      | 0.26                                     |
| FWP    | PreG   | 0.84                                              | 1.70                     | 0.21                      | -0.16                                    |
|        | PostG  | -0.98                                             | 2.05                     | 0.06                      | 0.33                                     |
| YRD    | PreG   | -0.02                                             | 4.1                      | 0.13                      | -0.32                                    |
|        | PostG  | -0.05                                             | 6.2                      | 0.09                      | -0.58                                    |
| PRD    | PreG   | 1.13                                              | 1.97                     | -1.02                     | 0.31                                     |
|        | PostG  | 0.31                                              | 3.20                     | -0.33                     | 0.92                                     |
| SCB    | PreG   | -0.49                                             | 2.80                     | 0.64                      | -0.78                                    |
|        | PostG  | -0.73                                             | 2.78                     | 0.21                      | 0.69                                     |

**Table 6.** Changes in total PM<sub>2.5</sub> concentrations (ALL, SIM<sub>Base</sub> - SIM<sub>2008</sub>) and the impacts of anthropogenic pollutant emissions (Emis, All-Met-CO<sub>2</sub>), meteorological conditions (Met, SIM<sub>Base</sub> - SIM<sub>MET=2008</sub>), and CO<sub>2</sub> emission (CO<sub>2</sub>, SIM<sub>Base</sub> - SIM<sub>CO2=2008</sub>) variations on PM<sub>2.5</sub> concentrations ( $\mu\text{g}/\text{m}^3$ ) during the EASM period in PreG (2009–2013) and PostG (2014–2018) phase relative to 2008.

| Region | Period | ALL    | Emis   | Met   | CO <sub>2</sub> |
|--------|--------|--------|--------|-------|-----------------|
| NCP    | PreG   | -8.69  | -5.28  | -4.01 | 0.6             |
|        | PostG  | -36.76 | -33.86 | -1.6  | -1.3            |
| FWP    | PreG   | -2.59  | -5.75  | 2.32  | 0.84            |
|        | PostG  | -22.16 | -22.18 | 1     | -0.98           |
| YRD    | PreG   | -14.77 | -8.44  | -6.31 | -0.02           |
|        | PostG  | -27.89 | -27.41 | -0.43 | -0.05           |
| PRD    | PreG   | -1.2   | -3.82  | 1.49  | 1.13            |
|        | PostG  | -8.03  | -8.45  | 0.11  | 0.31            |
| SCB    | PreG   | -10.59 | -10.39 | 0.29  | -0.49           |
|        | PostG  | -33.96 | -32.09 | -1.14 | -0.73           |

Other comments:

3. Section 2.3 and Table 1: Can you introduce a bit more detail of what processes CO<sub>2</sub> will influence in your model? Are the meteorological fields used in SIM<sub>Base</sub> and SIM<sub>CO2=2008</sub> the same or SIM<sub>Base</sub> also reflect the meteorology change due to CO<sub>2</sub>? In Fig 1, it seems that meteorology responses to YIBs that changes with CO<sub>2</sub>, then how do you apply the fixed meteorological field for SIM<sub>MET=2008</sub>? ignoring the response of CO<sub>2</sub> variation?

**Response:** Thanks. We added some descriptions of what processes CO<sub>2</sub> will influence in our model.

To clarify the experimental design, we have revised Table 1 and its description in the revised manuscript. The SIM<sub>2008</sub> experiment represents the baseline conditions for the year 2008. In the SIM<sub>Base</sub> experiment, interannual variations in meteorological



fields, CO<sub>2</sub> emissions, and anthropogenic pollutant emissions (excluding CO<sub>2</sub> emissions) were considered for simulations spanning 2009–2018, representing the baseline conditions for 2009–2018. Additionally, the SIM<sub>MET=2008</sub> and SIM<sub>CO<sub>2</sub>=2008</sub> experiments were designed, where meteorological fields and CO<sub>2</sub> emissions were fixed at their 2008 levels, respectively, while simulations were conducted for 2009–2018.

As shown in Table 1, SIM<sub>2008</sub> and SIM<sub>Base</sub> serve as baseline experiments that collectively capture the evolution of PM<sub>2.5</sub> concentrations under the combined influences of meteorological variability, CO<sub>2</sub> emission changes, and anthropogenic pollutant emissions changes (SIM<sub>Base</sub> - SIM<sub>2008</sub>).

The SIM<sub>Base</sub> and SIM<sub>CO<sub>2</sub>=2008</sub> experiments share identical meteorological conditions, differing only in their CO<sub>2</sub> emission datasets; by comparing SIM<sub>Base</sub> and SIM<sub>CO<sub>2</sub>=2008</sub> (SIM<sub>Base</sub> - SIM<sub>CO<sub>2</sub>=2008</sub>), we isolate the impact of CO<sub>2</sub> emission changes on PM<sub>2.5</sub>. Likewise, since SIM<sub>Base</sub> and SIM<sub>MET=2008</sub> use the same CO<sub>2</sub> emission inputs and differ only in meteorological fields, their comparison (SIM<sub>Base</sub> - SIM<sub>MET=2008</sub>) quantifies the effect of meteorological variability on PM<sub>2.5</sub>.

**Table 1.** The Numerical experimental in this study.

| Experiment                         | Time      | Meteorological fields | CO <sub>2</sub> emissions | Anthropogenic pollutant emissions |
|------------------------------------|-----------|-----------------------|---------------------------|-----------------------------------|
| SIM <sub>2008</sub>                | 2008      | 2008                  | 2008                      | 2008                              |
| SIM <sub>Base</sub>                | 2009-2018 | 2009-2018             | 2009-2018                 | 2009-2018                         |
| SIM <sub>MET=2008</sub>            | 2009-2018 | 2008                  | 2009-2018                 | 2009-2018                         |
| SIM <sub>CO<sub>2</sub>=2008</sub> | 2009-2018 | 2009-2018             | 2008                      | 2009-2018                         |

Changes in manuscript:

#### 2.1 Model description

(L141–148): “In the RegCM-Chem-YIBs model, changes in CO<sub>2</sub> concentrations affect PM<sub>2.5</sub> primarily via two mechanisms: first, CO<sub>2</sub>-induced radiative forcing alters the atmospheric radiation balance, leading to shifts in temperature, precipitation, and boundary-layer structure that modulate PM<sub>2.5</sub> formation, transport, and removal(Li and Mölders, 2008; Matthews, 2007); And second, through the YIBs module, changes in CO<sub>2</sub> concentration modulate photosynthetic activity and stomatal behavior, altering BVOCs emissions that undergo atmospheric photochemical oxidation to form secondary organic aerosols, a significant fraction of PM<sub>2.5</sub> (Kergoat et al., 2002; Kellomaki and Wang, 1998).”

#### 2.3 Experiment settings:

(L169–175): “The numerical experiments are presented in Table 1. The SIM<sub>2008</sub> experiment represents the baseline conditions for the year 2008. In the SIM<sub>Base</sub> experiment, interannual variations in meteorological fields, CO<sub>2</sub> emissions, and anthropogenic pollutant emissions (excluding CO<sub>2</sub> emissions) were considered for

simulations spanning 2009–2018, representing the baseline conditions for 2009–2018. Additionally, the  $SIM_{MET=2008}$  and  $SIM_{CO_2=2008}$  experiments were designed, where meteorological fields and CO<sub>2</sub> emissions were fixed at their 2008 levels, respectively, while simulations were conducted for 2009–2018.”

(L179–188): “By comparing the simulation results from different years in the  $SIM_{Base}$  experiment to  $SIM_{2008}$  ( $SIM_{Base} - SIM_{2008}$ ), we quantified changes in PM<sub>2.5</sub> concentrations relative to 2008 for the period 2009–2018. To evaluate the impact of meteorological conditions on PM<sub>2.5</sub> concentrations, we compared the results of the  $SIM_{Base}$  experiment with those of the  $SIM_{MET=2008}$  experiment for the same year ( $SIM_{Base} - SIM_{MET=2008}$ ). Similarly, the contribution of CO<sub>2</sub> emission changes to PM<sub>2.5</sub> variations was assessed by comparing the  $SIM_{Base}$  experiment with the  $SIM_{CO_2=2008}$  experiment ( $SIM_{Base} - SIM_{CO_2=2008}$ ) in the same year. The contribution of anthropogenic pollutant emissions was then determined by subtracting the effects of meteorological and CO<sub>2</sub> emission changes from the total PM<sub>2.5</sub> variation.”

## References

- Kellomaki, S. and Wang, K. Y.: Growth, respiration and nitrogen content in needles of Scots pine exposed to elevated ozone and carbon dioxide in the field, *Environmental pollution* (Barking, Essex : 1987), 101, 263-274, 10.1016/s0269-7491(98)00036-0, 1998.
- Kergoat, L., Lafont, S., Douville, H., Berthelot, B., Dedieu, G., Planton, S., and Royer, J. F.: Impact of doubled CO<sub>2</sub> on global-scale leaf area index and evapotranspiration:: Conflicting stomatal conductance and LAI responses -: art. no. 4808, *Journal of Geophysical Research-Atmospheres*, 107, 10.1029/2001jd001245, 2002.
- Li, Z. and Mölders, N.: Interaction of impacts of doubling CO<sub>2</sub> and changing regional land-cover on evaporation, precipitation, and runoff at global and regional scales, *International Journal of Climatology*, 28, 1653-1679, 10.1002/joc.1666, 2008.
- Matthews, H. D.: Implications of CO<sub>2</sub> fertilization for future climate change in a coupled climate-carbon model, *Global Change Biology*, 13, 1068-1078, 10.1111/j.1365-2486.2007.01343.x, 2007.

4. line 148: as the impact of meteorological conditions is calculated by  $SIM_{base-SIM_{met=2008}}$ , it is likely to also include influences of CO<sub>2</sub>.

**Response:** Thanks.  $SIM_{Base}$  and  $SIM_{MET=2008}$  use the same CO<sub>2</sub> emission inputs and differ only in meteorological fields, their comparison ( $SIM_{Base} - SIM_{MET=2008}$ ) quantifies the effect of meteorological variability on PM<sub>2.5</sub>. Please refer to comment 3 for a detailed response.

5. line 154-158: it would be better to bring some information of model evaluation to the text instead of letting the audience check all the information in other references. e.g., you might also show numbers for measured PM<sub>2.5</sub> trend when discussing the simulation results in Section 3.1, or include figures to compare with observations in



supplements.

**Response:** Thank you for your invaluable suggestions. We have incorporated the model evaluation results into the manuscript and expanded the corresponding descriptions.

Changes in manuscript:

#### 2.4 Model evaluations

(L198–207): “Observed PM<sub>2.5</sub> data were obtained from the China National Environmental Monitoring Center (CNEMC). This study used hourly PM<sub>2.5</sub> concentrations during the summer monsoon period (May 1 to August 31) from 2015 to 2018. A total of 366 monitoring stations across Chinese cities, selected based on data completeness and representativeness, were used for model validation. The locations of these stations are shown in Fig. S5. CO<sub>2</sub> observations were sourced from the World Data Centre for Greenhouse Gases (WDCGG), including all seven sites in East Asia: Waliguan, Korea Tae-ahn Peninsula, Ulaanbaatar in Mongolia, Lulin, Yonagunijima, Cape D'Aguilar (Hong Kong), and King's Park. Detailed station locations are shown in Fig. S6. Reanalysis data for temperature, wind fields, and relative humidity were obtained from the ERA-Interim dataset.”

(L208–21): “As shown in Table 2 and Figures S1–S6, the SIM<sub>Base</sub> experiments reproduce 2015–2018 PM<sub>2.5</sub> and CO<sub>2</sub> concentrations with high correlations and low biases relative to observations, while their simulated meteorological fields closely match reanalysis data. Overall, the RegCM-Chem-YIBs model effectively captures the fundamental characteristics and temporal trends of meteorological factors, PM<sub>2.5</sub>, and CO<sub>2</sub> concentrations in East Asia.”

**Table 2.** Evaluations of the near-surface CO<sub>2</sub> and PM<sub>2.5</sub> in East Asia.

| Species                                   | Year | Observation | Simulation | Bias   | RMSE  | R    |
|-------------------------------------------|------|-------------|------------|--------|-------|------|
| CO <sub>2</sub><br>(ppm)                  | 2015 | 402.82      | 406.98     | 4.16   | 9.37  | 0.44 |
|                                           | 2016 | 407.12      | 410.44     | 3.32   | 8.22  | 0.69 |
|                                           | 2017 | 408.35      | 413.62     | 5.27   | 11    | 0.39 |
|                                           | 2018 | 409.61      | 416.68     | 7.07   | 11.32 | 0.41 |
| PM <sub>2.5</sub><br>(ug/m <sup>3</sup> ) | 2015 | 36.6        | 25.57      | -11.03 | 12.99 | 0.71 |
|                                           | 2016 | 31.03       | 22.91      | -8.12  | 10.31 | 0.64 |
|                                           | 2017 | 29.61       | 24.02      | -5.59  | 10.57 | 0.71 |
|                                           | 2018 | 27.18       | 19.04      | -8.14  | 11.62 | 0.61 |

RMSE: root mean square error; R: correlation coefficient.

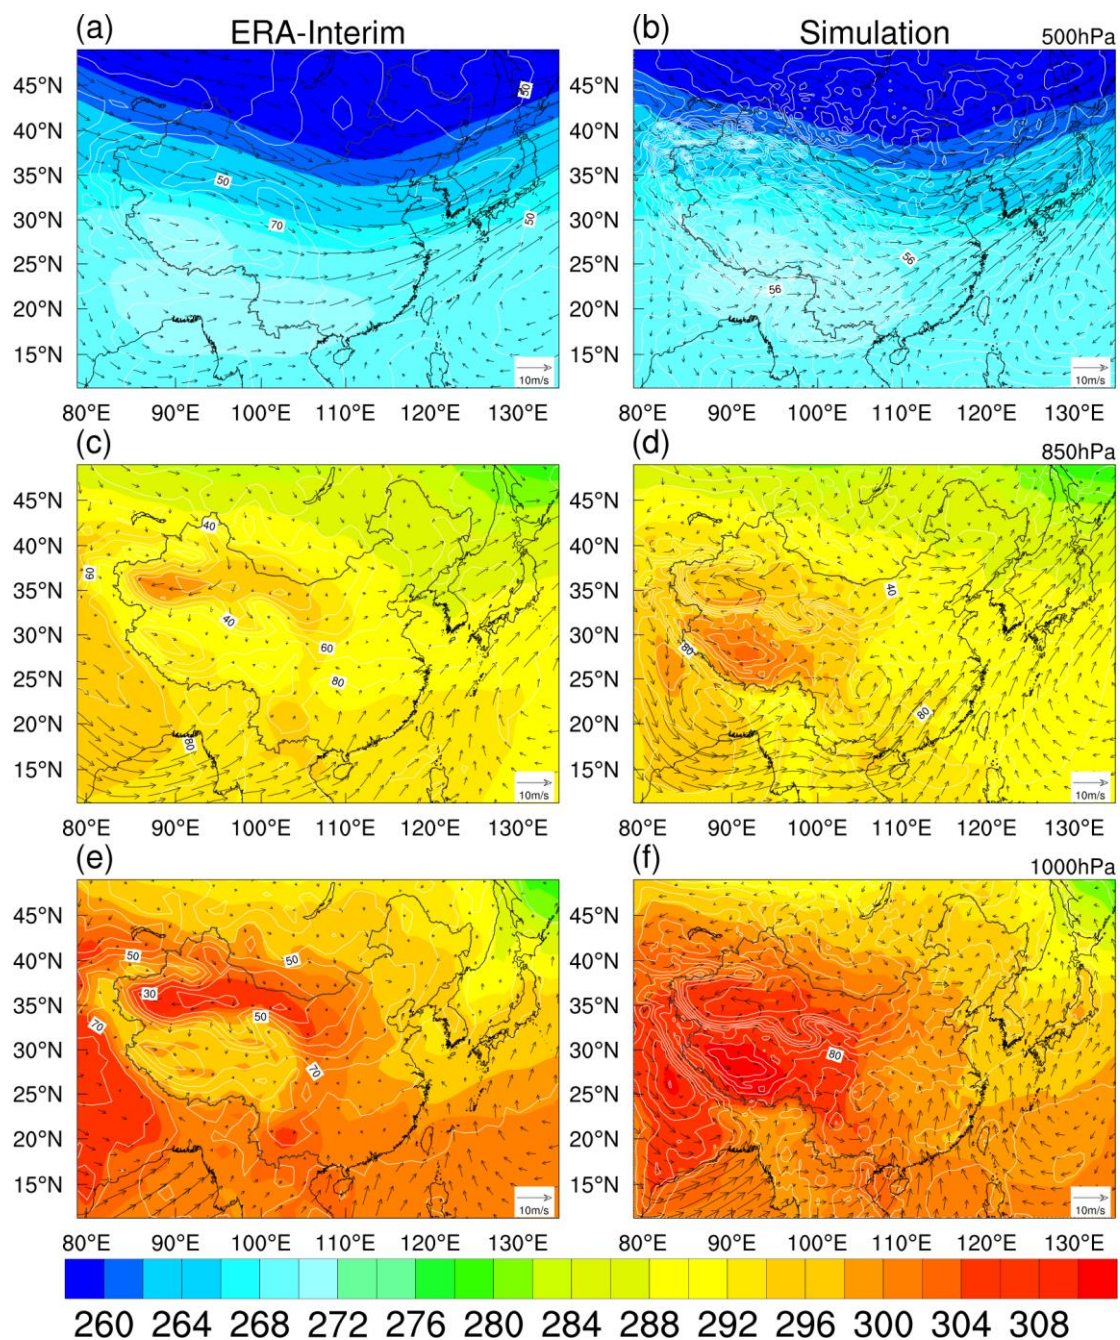

**Figure S1.** Comparisons between the simulated (right) and reanalysis (left) mean temperature (shading, units: K), wind (vectors, units: m/s), and relative humidity (contours, units: %) at 500 hPa (a, b), 850 hPa (c, d) and 1000 hPa (e, f) during the EASM period in 2015.



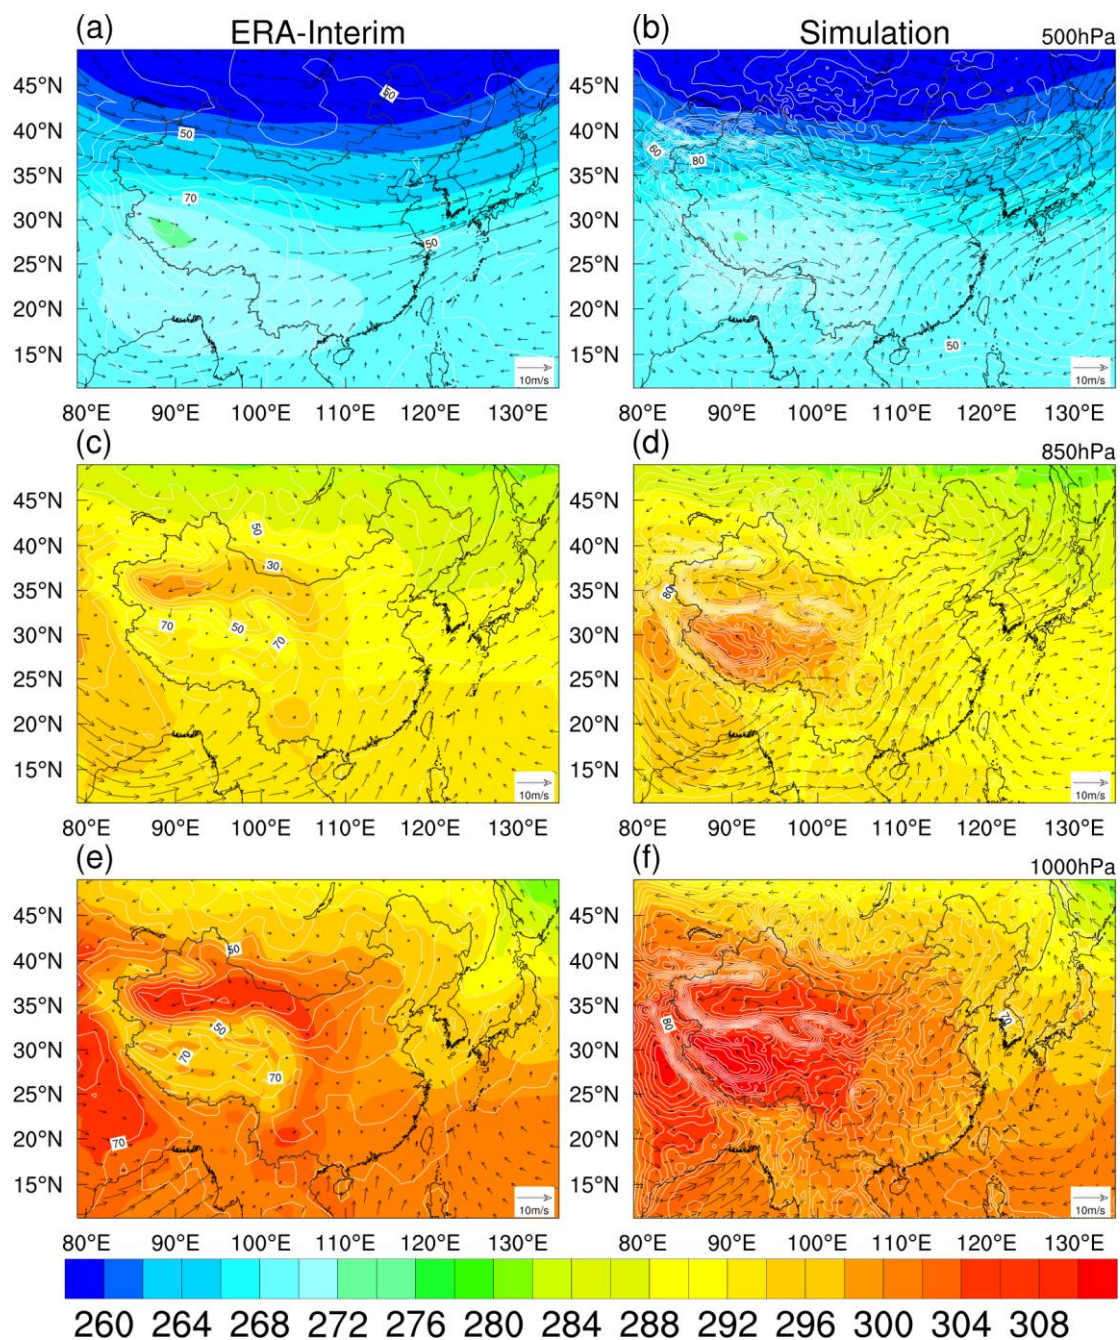

**Figure S2.** Comparisons between the simulated (right) and reanalysis (left) mean temperature (shading, units: K), wind (vectors, units: m/s), and relative humidity (contours, units: %) at 500 hPa (a, b), 850 hPa (c, d) and 1000 hPa (e, f) during the EASM period in 2016.



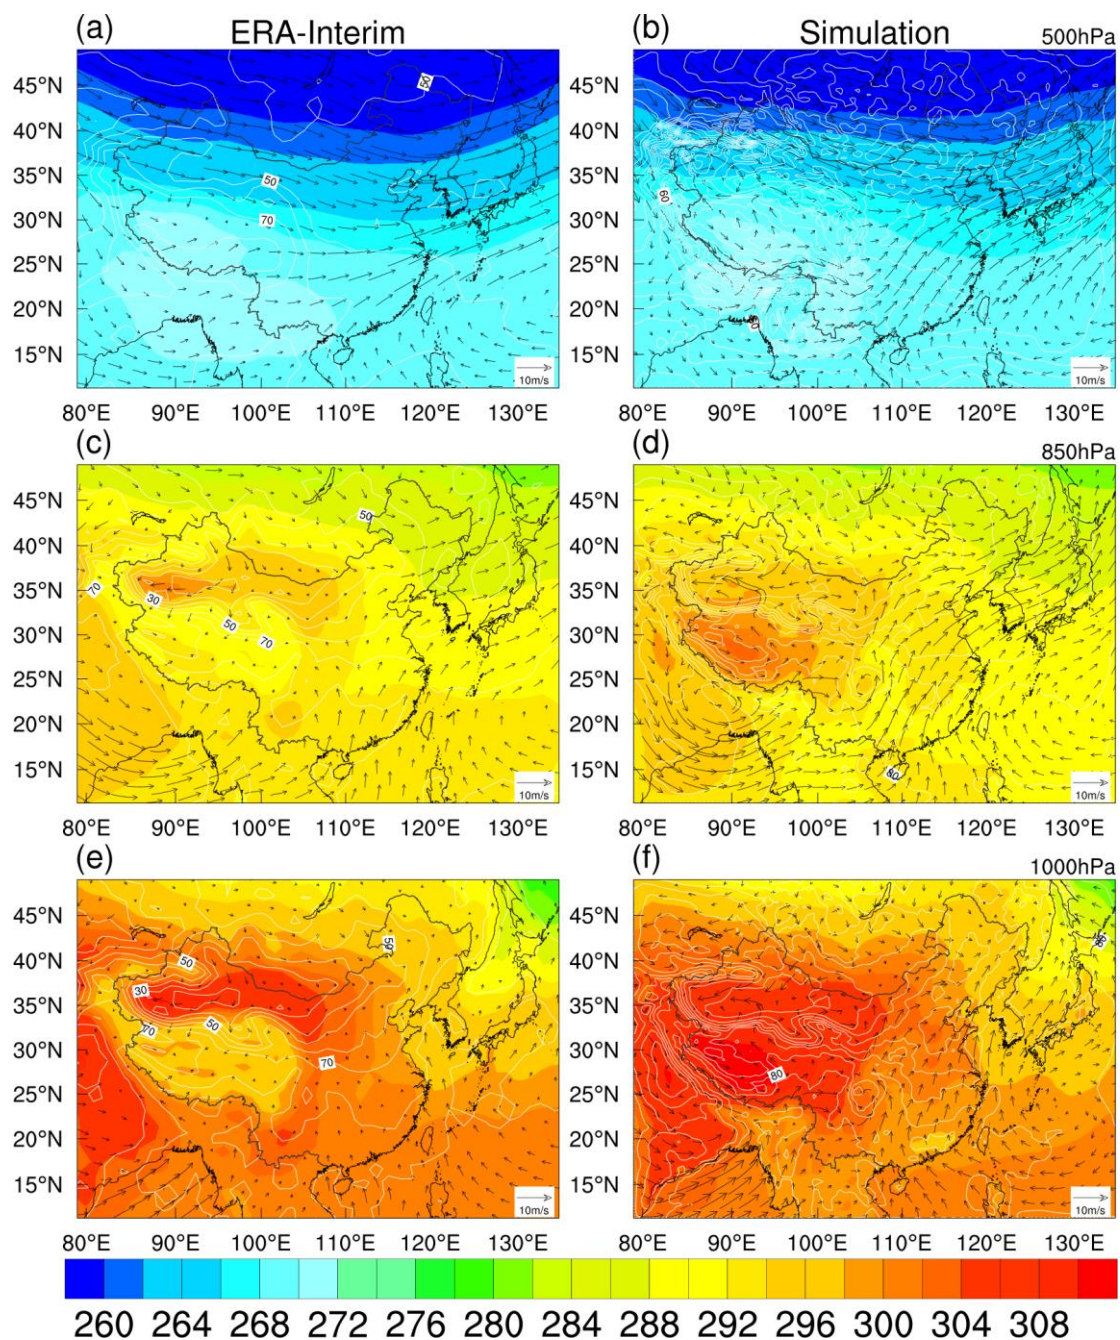

**Figure S3.** Comparisons between the simulated (right) and reanalysis (left) mean temperature (shading, units: K), wind (vectors, units: m/s), and relative humidity (contours, units: %) at 500 hPa (a, b), 850 hPa (c, d) and 1000 hPa (e, f) during the EASM period in 2017.



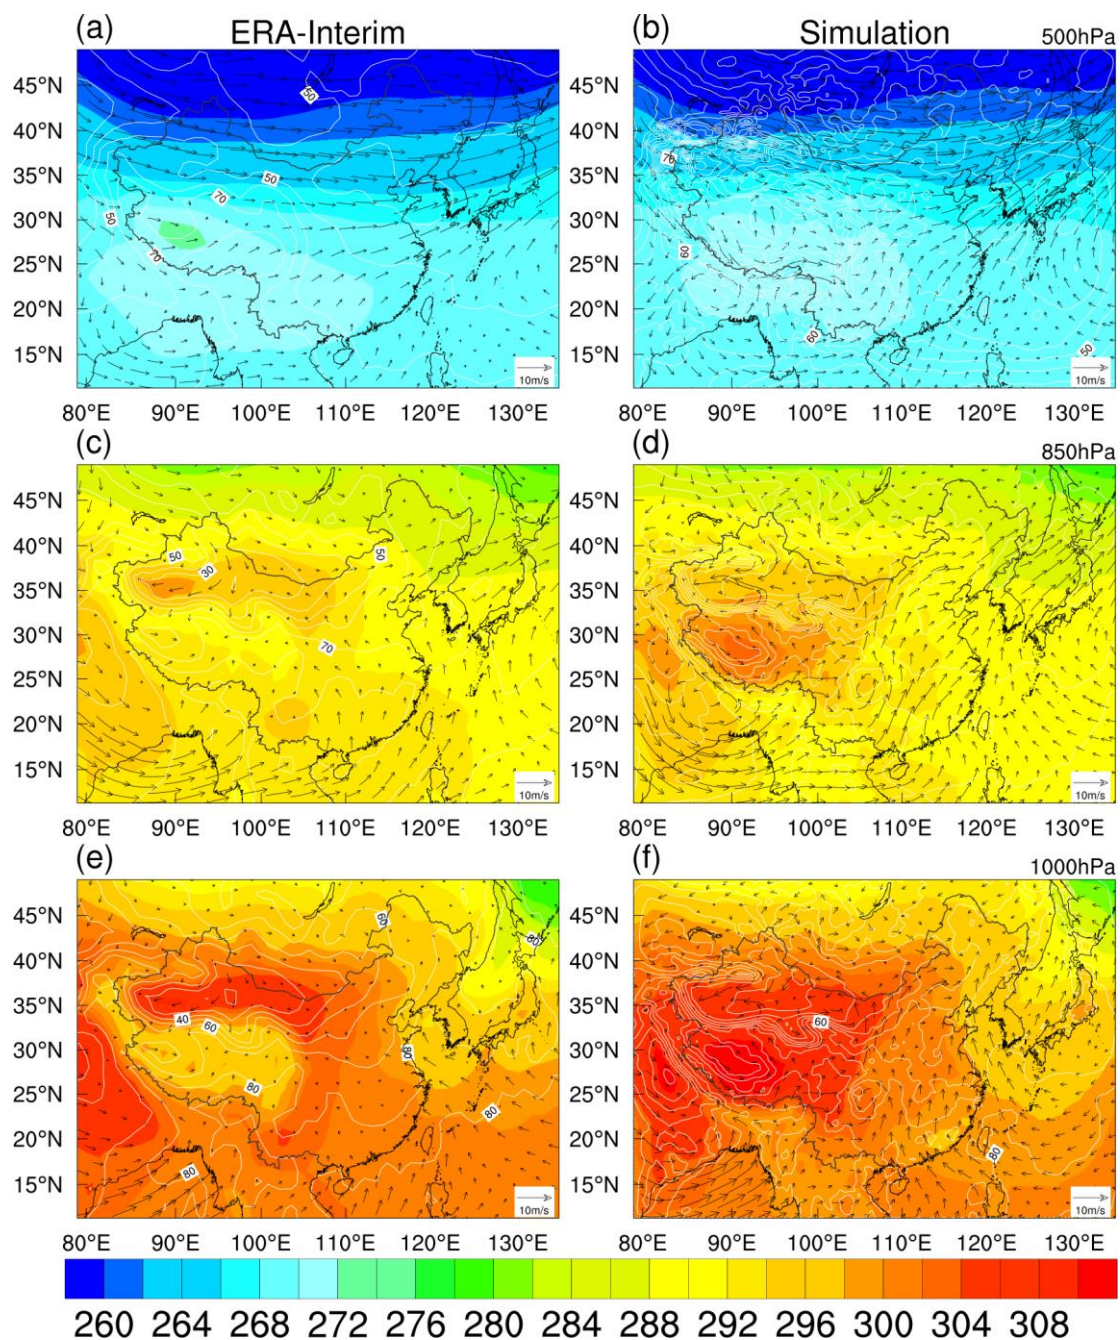

**Figure S4.** Comparisons between the simulated (right) and reanalysis (left) mean temperature (shading, units: K), wind (vectors, units: m/s), and relative humidity (contours, units: %) at 500 hPa (a, b), 850 hPa (c, d) and 1000 hPa (e, f) during the EASM period in 2018.

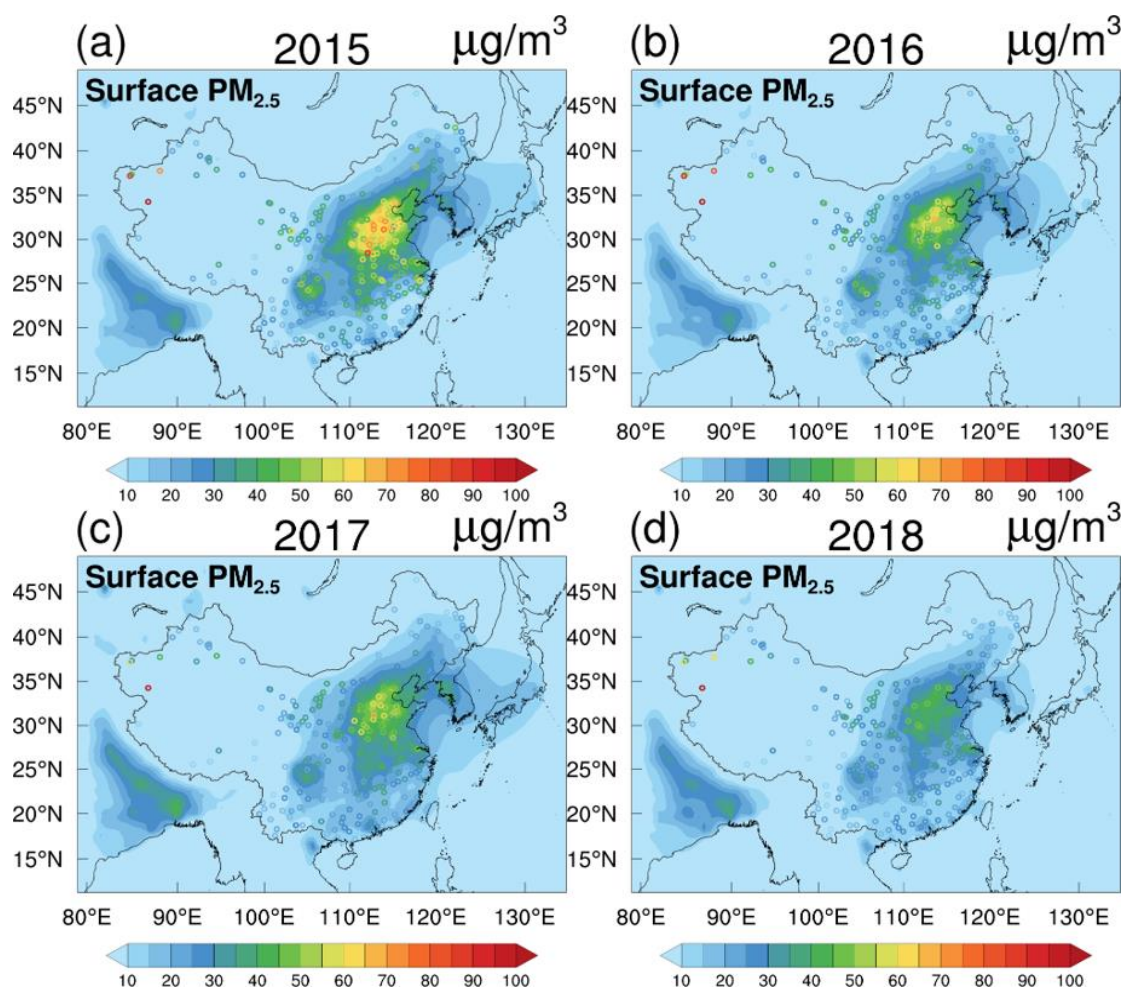

**Figure S5.** Comparisons between the simulated and observed near-surface PM<sub>2.5</sub> concentrations (units:  $\mu\text{g}/\text{m}^3$ ) during the EASM period in (a)2015, (b)2016, (c)2017, (d)2018. Colored circles represent the observations.



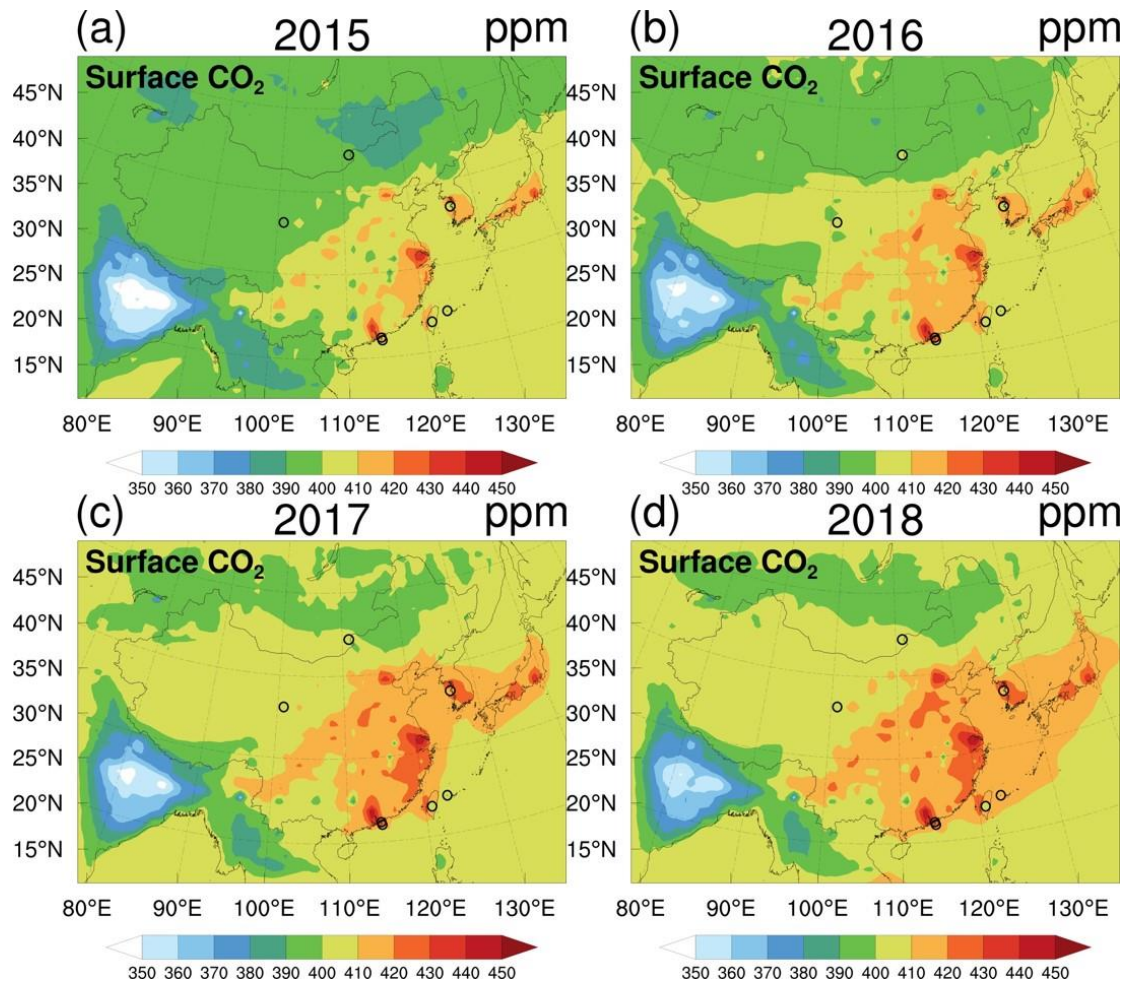

**Figure S6.** Comparisons between the simulated and observed near-surface CO<sub>2</sub> concentrations (units: ppm) during the EASM period in (a)2015, (b)2016, (c)2017, (d)2018. Colored circles represent the observations.

6. The wording of “anthropogenic emissions” driver in many places of the manuscript might need to be clearer. One key question is whether it is also the anthropogenic emissions contributing to the CO<sub>2</sub> changes. If so, the “anthropogenic emissions” in the text should means non-CO<sub>2</sub> emissions.

**Response:** Thank you for highlighting this critical issue. In response, we have revised the manuscript to replace all instances of “anthropogenic emissions” with “anthropogenic pollutant emissions”. Additionally, in Section 2.3 Experiment settings, we have clarified that “anthropogenic pollutant emissions” exclude CO<sub>2</sub> emissions.

### 2.3 Experiment settings:

(L170–173): “In the SIM<sub>Base</sub> experiment, interannual variations in meteorological fields, CO<sub>2</sub> emissions, and anthropogenic pollutant emissions (excluding CO<sub>2</sub> emissions) were considered for simulations spanning 2009–2018, representing the baseline conditions for 2009–2018.”

7. Section 3.3: Will CO<sub>2</sub> also change temperature and cloud due to its effects on

radiation balance? Are those negligible factors comparing to those shown in Fig 5?

**Response:** Thanks. CO<sub>2</sub> alters atmospheric radiative properties, thereby influencing meteorological factors such as temperature, cloud cover, and precipitation. Our analysis of the relationships between temperature, cloud cover, and PM<sub>2.5</sub> concentrations indicates that their direct effects are insignificant. Specifically, cloud cover affects PM<sub>2.5</sub> primarily through indirect mechanisms, including modulation of solar radiation and changes in planetary boundary layer height. Temperature influences PM<sub>2.5</sub> via multiple complex pathways, such as regulating secondary organic aerosol formation, vertical convection, and boundary layer dynamics. In contrast, precipitation directly removes PM<sub>2.5</sub> through wet deposition processes. Therefore, the primary pathways through which CO<sub>2</sub> impacts PM<sub>2.5</sub> concentrations are its modulation of precipitation patterns and its influence on biogenic volatile organic compound (BVOC) emissions from vegetation.
